# Supplementary material for: Diagnostic performance evaluation of urine HIV-1 antibody rapid test kits in a real-life routine care setting in China
Source: HighWire-hosted journal article supplement (doi:10.1136/bmjopen-2023-078694), 2024-02-01
Supplement: bmjopen-2023-078694supp002_data_supplement.pdf [file bmjopen-2023-078694supp002_data_supplement.pdf]

**supplementary Table 2** The receiver operator characteristic curves for Reagents A and B in the 2606 subjects

| Reagents | Results <sup>a</sup> | Results |    | Statistical parameters of ROC curves |               |             |             |              |          |
|----------|----------------------|---------|----|--------------------------------------|---------------|-------------|-------------|--------------|----------|
|          |                      | -       | +  | <i>AUC</i>                           | <i>95% CI</i> | Sensitivity | Specificity | Youden index | <i>p</i> |
| A        | -                    | 2553    | 2  | 0.960                                | 0.952-0.968   | 92.16       | 99.92       | 0.921        | <0.001   |
|          | +                    | 4       | 47 |                                      |               |             |             |              |          |
| B        | -                    | 2555    | 0  | 1.000                                | 0.999-1.000   | 100.00      | 100.00      | 1.000        | <0.001   |
|          | +                    | 0       | 51 |                                      |               |             |             |              |          |

a: **supplementary Table 2** presents the detailed diagnostic results for Table 4.
